# Supplementary material for: In Vivo Identification of Solar Radiation-Responsive Gene Network: Role of the p38 Stress-Dependent Kinase
Source: PLoS One. 2010 May 21;5(5):e10776. doi: 10.1371/journal.pone.0010776 (PMC2874014; doi:10.1371/journal.pone.0010776)
Supplement: Table S4 — T-Test values. (0.01 MB XLS) [file pone.0010776.s004.xls]

## Sheet: Feuil1
Table S4: T-Test values
	SNX5	IL-20	HAS1	Gadd45	PMAIP1	SFN	P21	HAS3	AREG	HBEGF	p63	CYP2R1
2J/cm2 DMSO	0.000426084	0.180679	0.0281901	0.0306568	0.0496395	0.00141499	0.018483	0.0180019	0.0272742	0.0116276	0.0448533	0.0451402
4J/cm2 DMSO	0.00124602	0.00453415	0.00603962	0.000229687	0.020521	1.23451e-06	0.000437119	0.00101334	0.000309303	0.00338883	0.00383742	0.00697476
2J/cm2 SB203580	0.174179	0.223669	0.0660133	0.275675	0.199579	0.00150399	0.152529	0.0834208	0.0459595	0.0396111	0.034605	0.0121942
4J/cm2 SB203580	0.355297	0.357046	0.312118	0.340738	0.0815494	0.000272618	0.015691	0.0040799	0.00450636	0.0244942	0.0484838	0.384992
